# Supplementary material for: Analysis of the nucleocytoplasmic shuttling RNA-binding protein HNRNPU using optimized HITS-CLIP method
Source: PubMed Central journal article supplement (PMC7164624; doi:10.1371/journal.pone.0231450), 2020-04-17
Supplement: pone.0231450.s005.pdf [file pone.0231450.s005.pdf]

---

# Optimized-CLIP Protocol

---

Optimized-CLIP Standard Protocol v1.0 (2020/02/027) by Masato Yugami ([masato.yugami@takeda.com](mailto:masato.yugami@takeda.com))

Comments/Logs

## Steps

---

- Day 0\*:** I. UV crosslinking *\*Day 0 procedure could be done on the same day for that of Day 1*
- Day 1:** II. RNase treated lysate preparation  
III. Immunoprecipitation (Binding)
- Day 2:** IV. Immunoprecipitation (Wash)  
V. 3'-end dephosphorylation  
VI. (5'-end labeling)  
VII. PAGE & Membrane transfer  
VIII. RNA-RBP complex extraction
- Day 3:** IX. 3'-linker ligation & column purification  
X. cDNA synthesis  
XI. cDNA purification by IP  
XII. Circularization & Re-linearization  
IXX. Phenol/Chloroform extraction & Ethanol precipitation
- Day 4:** XX. Amplification PCR  
XXI. Size purification by PAGE
- Day 5:** XX. Generated CLIP library QC check (Bioanalyzer & qPCR)  
XXI. Sequence with MiSeq
- Day x:** S-I. 5'-adenylated 3'-linker preparation

# Materials

---

## **Enzyme**

RQ1 DNase (M610A, Promega)  
RNase A (70194Y, Affymetrix)  
T4 Polynucleotide Kinase (PNK) (M0201, NEB)  
Proteinase K (AM2546, Ambion)  
T4 RNA Ligase 1 (M0204, NEB)  
Superscript III (18080-044, Invitrogen)  
RNase H (18021-014, Invitrogen)  
CircLigase II ssDNA Ligase (CL9021K, Epicentre)  
APE 1 (M0282, NEB)

## **Reagent**

Halt Protease Inhibitor Cocktail (100x) (78430, Thermo)  
Dynabeads Protein G (10004D, Invitrogen)  
RNaseOUT (10777-019, Invitrogen)  
100 mM dNTP Set (10297-018, Invitrogen)  
10 mM BrdUTP (B21550, Invitrogen)  
GlycoBlue Coprecipitant (AM9515, Ambion)  
Phusion High-Fidelity PCR Master Mix (M0531, NEB)  
SYBR Green I (S7563, Invitrogen)  
SYBR Gold (S11494, Invitrogen)  
MicroSpin G-25 Column (95017-621, GE Healthcare)  
Nanosep MF column (ODM45C33, PALL)

## **Marker**

ΦX174 DNA/HinfI Dephosphorylated Markers (E3511, Promega)  
Small RNA II Ladder Marker (DM192, BioDynamics Lab)

## **Antibody**

Normal mouse IgG (12-370, Millipore)  
Normal rabbit IgG (12-371, Millipore)  
Anti-BrdU antibody, clone IIB5 (MAB3222, Millipore)

## **Solution**

Acid-Phenol:Chloroform (AM9720, Ambion)  
Phenol:Chloroform:IAA (AM9730, Ambion)  
50x Denhardt's solution (750018, Invitrogen)

## **Kit**

5' DNA Adenylation Kit (E2610, NEB)  
RNeasy MinElute Cleanup Kit (74204, Qiagen)  
MinElute Gel Extraction Kit (28604, Qiagen)

# Buffers

---

## Beads Prep Buffer

1x PBS  
0.02% Tween-20

## Whole Lysis Buffer

1x PBS  
0.1% SDS  
0.5% NaDOC  
0.5% NP-40

## High-salt Wash Buffer

5x PBS  
0.1% SDS  
0.5% NaDOC  
0.5% NP-40

## PNK Buffer

50 mM Tris-HCl (pH 7.5)  
10 mM MgCl<sub>2</sub>  
0.5% NP-40

## 5x PNK Phosphate Buffer (pH 6.5)

350 mM Tris-HCl (pH 6.5)  
10 mM MgCl<sub>2</sub>  
0.5% NP-40

## PNK+EGTA Buffer

50 mM Tris-HCl (pH 7.5)  
20 mM EGTA  
0.5% NP-40

## PK Buffer

100 mM Tris-HCl (pH 7.5)  
50 mM NaCl  
10 mM EDTA

## 2xIP Buffer

0.5x SSPE  
2 mM EDTA  
0.1% Tween-20

## Nelson Low-salt Buffer

15 mM Tris-HCl (pH 7.5)  
5 mM EDTA

## Nelson Stringent Buffer

15 mM Tris-HCl (pH 7.5)  
5 mM EDTA  
120 mM NaCl  
25 mM KCl  
2.5 mM EGTA  
1% Triton X-100  
1% NaDOC  
0.1% SDS

## CircLigase Wash Buffer

33 mM Tris-Acetate (pH 8.0)  
66 mM KOAc (pH 5.5)

## Diffusion Buffer

500 mM Ammonium acetate  
10 mM Magnesium acetate  
1 mM EDTA (pH 8.0)  
0.1% SDS

# Oligos

---

We purchased all oligo nucleotides from Sigma Genosys (<http://www.genosys.jp>)

## 3' Linker RNA

RL3: 5'-p\_UCGUAUGCCGUCUUCUGCUUG\_N(6)-3'

[p=Phosphorylation, N(6)=amino C6 linker]

## Barcoded RT Primer DNAs

RT1\_GCAT: 5'-p\_GNNNNNNNNG-ATGC-GATCGTCGGACTGTAGAACTCT\_α\_CAAGCAGAAGACGGCATAACGA-3'

RT2\_GTCA: 5'-p\_GNNNNNNNNG-TGAC-GATCGTCGGACTGTAGAACTCT\_α\_CAAGCAGAAGACGGCATAACGA-3'

RT3\_ACTG: 5'-p\_GNNNNNNNNG-CAGT-GATCGTCGGACTGTAGAACTCT\_α\_CAAGCAGAAGACGGCATAACGA-3'

RT4\_AGCT: 5'-p\_GNNNNNNNNG-AGCT-GATCGTCGGACTGTAGAACTCT\_α\_CAAGCAGAAGACGGCATAACGA-3'

RT5\_TGAC: 5'-p\_GNNNNNNNNG-GTCA-GATCGTCGGACTGTAGAACTCT\_α\_CAAGCAGAAGACGGCATAACGA-3'

RT6\_TCGA: 5'-p\_GNNNNNNNNG-TCGA-GATCGTCGGACTGTAGAACTCT\_α\_CAAGCAGAAGACGGCATAACGA-3'

[N=mix DNA, p=Phosphorylation, α=dSpacer]

## PCR Primer DNAs

DSFP5-PE: 5'-AATGATACGGCGACCACCGAGATCTACACCAGGTTTCAGAGTTCTACAGTCCGACG-3'

SP3: 5'-CAAGCAGAAGACGGCATA-3'

# Procedure

---

## Day 0

### I. UV cross-linking of tissue/cell cultures

#### For tissues (this case for mouse brain):

1. Harvest tissue from embryonic brain and let it sit in ice-cold HBSS
2. Add 10x volume of HBSS and triturate tissue by 3-times pipetting using a 5 mL pipet
3. Repeat to triturate by 3-times pipetting using the previously used 5 mL pipet added a 100  $\mu$ L micropipette tip at the point
4. Transfer tissue suspension in a 10-cm dish
5. Irradiate UV on ice 3 times for 400  $\text{mJ}/\text{cm}^2$  ([total 1,200  $\text{mJ}/\text{cm}^2$ ])
6. Recover the suspension in 15 mL tubes
7. Centrifuge at 1,300 $\times$ g, 4  $^{\circ}\text{C}$ , 5 min
8. Remove supernatant
9. Resuspend in 1 mL of HBSS, transfer in a 1.5 mL micro tube
10. Centrifuge at 2,500 $\times$ g, 4  $^{\circ}\text{C}$ , 5 min
11. Discard supernatant and freeze the cell pellet at -80  $^{\circ}\text{C}$  until use

#### For cell cultures:

1. Grow cells in a 10-cm or 15-cm dish
2. Irradiate UV on ice twice for 300  $\text{mJ}/\text{cm}^2$  [total 600  $\text{mJ}/\text{cm}^2$ ]
3. Remove the medium, wash once with ice-cold 1x PBS
4. Scrape the cells in 1x PBS, transfer the cell suspension to a 1.5 mL micro tube
5. Centrifuge at 2,500 $\times$ g, 4  $^{\circ}\text{C}$ , 5 min
6. Discard supernatant and freeze the cell pellet at -80  $^{\circ}\text{C}$  until use

## Day 1

### II. Immunoprecipitation (Binding)

#### RNase-treated lysate preparation:

1. Add 1 mL of ice-cold Whole Lysis Buffer to a stored cell pellet
2. Add 10  $\mu$ L of 100x Protease Inhibitor Cocktail, mix well
3. Sit on ice for 10 min to lyse
4. (Optional) Sonicate in Bioruptor at 'low' density, 4  $^{\circ}\text{C}$ , 5 cycles with alternating 30 sec on / 30 sec off
5. Add 15  $\mu$ L of DNase, incubate in Thermomixer at 1000 rpm at 37  $^{\circ}\text{C}$  for 5 min
6. Add 6.25  $\mu$ L of 1:100 (High) or 1:10000 (Low)\* RNase A diluted with Whole Lysis Buffer, incubate in Thermomixer at 1,000 rpm at 37  $^{\circ}\text{C}$  for 5 min *\*need to optimize because the desirable concentration is varied depending on cell/tissue species, cell/tissue density, target RBPs, etc...*
7. Ultracentrifuge at 30,000 rpm at 4  $^{\circ}\text{C}$  for 20 min using TLA120.2 rotor (Beckman Coulter)
8. Collect supernatant as "RNase-treated lysate"
9. (Optional) If western blot analysis is performed, collect 10  $\mu$ L (1%) of the lysate as a "Input" sample

#### Antibody-coupled beads preparation:

1. Suspend Dynabeads Protein G thoroughly by vortex
2. Dispense 50  $\mu$ L per sample of Dynabeads Protein G in a 1.5 mL micro tube

3. Stand on a magnetic stand, remove supernatant
4. Wash the beads 3 times with Beads Prep Buffer
5. Add 5 µg of anti-RBP or control antibody in 100 µL of washed beads
6. Rotate the beads at room temp for 1 hr
7. Wash the beads 3 times with 1 mL of Beads Prep Buffer
8. Stand on a magnetic stand, remove supernatant
9. Add the whole volume of "RNase-treated lysate" to the beads, rotate at 4 °C for overnight

## Day 2

### III. Immunoprecipitation (Wash)

1. Wash twice with 1 mL of ice-cold Whole Lysis Buffer
2. Wash twice with 1 mL of ice-cold High-salt Wash Buffer
3. Wash twice with 1 mL of ice-cold PNK Buffer

### IV. Dephosphorylation by PNK<sub>pH6.5</sub> (On-Beads)

#### PNK-dephosphorylation mix

|                                    |       |
|------------------------------------|-------|
| 5x PNK Phosphatase Buffer (pH 6.5) | 4 µL  |
| PNK                                | 1 µL  |
| RNaseOUT                           | 1 µL  |
| RNase-free water                   | 14 µL |

1. Add 20 µL of PNK dephosphorylation mix to each sample, incubate in Thermomixer at 1000 rpm for 15 sec every 2 min, 37 °C, 20 min
2. Wash once with 1 mL of ice-cold PNK Buffer
3. Wash once with 1 mL of ice-cold PNK+EGTA Buffer
4. Wash twice with 1 mL of ice-cold PNK Buffer
5. (Optional) If western blot analysis is performed, resuspend in 1 mL of PNK buffer, and collect 100 µL (10%) of the lysate as a "IP" sample.

### V. 5'-end labeling (On-Beads)

*We usually execute in optimization experiments (until step VI), but skip this step in CLIP-library generation.*

#### PNK labeling mix

|                                   |       |
|-----------------------------------|-------|
| 10x PNK reaction buffer           | 4 µL  |
| PNK                               | 2 µL  |
| [ $\gamma$ - <sup>32</sup> P] ATP | 2 µL  |
| RNase-free water                  | 32 µL |

6. Add 40 µL of PNK labeling mix to each sample, incubate in Thermomixer at 1000 rpm for 15 sec every 2 min, 37 °C, 20 min
7. (Option) Add 10 µL of 1 mM ATP, prolong incubation in Thermomixer at 1000 rpm for 15 sec every 2 min, 37 °C, 5 min
8. Wash once with 1 mL of ice-cold PNK Buffer
9. Wash once with 1 mL of ice-cold High-salt Wash Buffer
10. Wash twice with 1 mL of ice-cold PNK Buffer

### VI. SDS-PAGE & nitrocellulose transfer

1. Stand on a magnetic stand, remove supernatant
2. Add 20 µL of 1x NuPAGE LDS Sample Buffer diluted with PNK Buffer, denature in Thermomixer at 1000 rpm, 70 °C, 10 min

3. Stand on a magnetic stand, load the supernatant on 12-well NuPAGE mini gel [4-12% Bis-Tris or 3-8% Tris-Acetate mini gel]\*  
\*dependent on Mw of a target RBP
4. Run at 150 V, 60 min in cold showcase [with corresponding buffer to the gel: 1x MOPS or 1x TA Buffer]
5. Transfer gel to nitrocellulose membrane in 1x NuPAGE Transfer Buffer with 10% Methanol at 30V, 1 hour in cold showcase
6. Rinse the membrane with 1x PBS, wrap and expose to BAS imaging plate in a cassette for 1-2 hours
7. Visualize autoradiogram with a bioimaging analyzer (GE Typhoon FLA 7000)

## VII. RNA Isolation & Purification

1. Print out autoradiogram in actual size, and mark the position of smear RNA-RBP complex bands on a weighing paper
2. Excise the bands on the membrane over marked weighing paper with a clean scalpel
3. Cut into small pieces, put into a 1.5 mL micro tube
4. Preheat 4 mg/mL protease K diluted with PK Buffer, 37 °C, 20 min
5. Add 200 µL of protease K solution, incubate in Thermomixer at 1000 rpm, 37 °C, 20 min
6. Add 200 µL of 7M Urea in PK Buffer, incubate in Thermomixer at 1000 rpm, 37 °C, 20 min
7. Add 400 µL of Acid-Phenol:Chloroform, mix by vortex mixer, incubate in Thermomixer at 1000 rpm, 37 °C, 20 min
8. Centrifuge at 20,000xg, room temp., 5 min
9. Transfer aqueous phase to a new 1.5 mL micro tube.
10. Add 50 µL of 3M NaOAc (pH5.5), 1 mL of 1:1 mix of ethanol and isopropanol, 1.5 µL of GlycoBlue
11. Precipitate, -30 °C, overnight

## Day 3

### 3'-linker Ligation & Cleanup

#### 3'-linker Ligation:

1. Centrifuge the RNA at 20,000xg, 4 °C, 10 min
2. Wash twice with 1mL of cold 75% ethanol
3. Dry up the pellet, resuspend in 10 µL of RNase-free water\*

*Here, we also use 10 µL of 10,000-fold diluted Small RNA II ladder (DM192) as positive control*

#### Ligation mix

|                          |        |
|--------------------------|--------|
| 20 µM rApp-3'-linker     | 1 µL   |
| 10x T4 RNA Ligase Buffer | 2 µL   |
| RNaseOUT                 | 0.5 µL |
| T4 RNA Ligase 1          | 1 µL   |
| RNase-free water         | 1.5 µL |

4. Add 6 µL Ligation mix and 4 µL preheated PEG400, incubate, 37 °C, 1 hour

#### Cleanup 3' linker-ligated RNA using RNeasy MinElute Cleanup Kit:

1. Add 80 µL RNase-free water in a post ligation reaction tube
2. Add 350 µL Buffer RLT, and mix well
3. Add 700 µL 100% ethanol, and mix well
4. Transfer 700 µL of the sample to an RNeasy MinElute spin column placed in a 2 mL collection tube
5. Centrifuge at 10,000xg, room temp., 15 sec, and then discard the flow-through
6. Transfer the remaining sample, repeat to centrifuge and discard
7. Place the spin column in a new 2 mL collection tube

8. Add 500  $\mu$ L Buffer RPE
9. Centrifuge at 10,000xg, room temp., 15 sec, and then discard the flow-through
10. Add 500  $\mu$ L 80% ethanol
11. Centrifuge at 10,000xg, room temp., 15 sec, and then discard the flow-through
12. Place the spin column in a new 2 mL collection tube, open its lid
13. Centrifuge at 20,000xg, room temp., 5 min
14. Place the spin column in a new 1.5 mL collection tube
15. Add 10  $\mu$ L RNase-free water directly to the center of the spin column membrane
16. Centrifuge at 20,000xg, room temp., 1 min
17. Recover the flow-through (eluted 3'-linker ligated RNA)

### VIII. cDNA synthesis & Immunoprecipitation

#### Anti-BrdU antibody-coupled beads preparation:

1. Suspend Dynabeads Protein G thoroughly by vortex
2. Dispense 25  $\mu$ L per sample of Dynabeads Protein G in a 1.5 mL micro tube
3. Stand on a magnetic stand, remove supernatant
4. Wash the beads 3 times with Beads Prep Buffer
5. Add 125  $\mu$ L of 5x Denhardt's solution diluted with Beads Prep Buffer
6. Rotate the beads at room temp. for 1 hr
7. Wash the beads 3 times with 1 mL of Beads Prep Buffer
8. Add 2.5  $\mu$ g of anti-BrdU antibody, 5  $\mu$ L of 50x Denhardt's solution, and Beads Prep Buffer up to 50  $\mu$ L
9. Rotate the beads at room temp. for 1 hr
10. Wash the beads 3 times with 1 mL of 1x IP Buffer

#### Reverse Transcription:

1. Transfer 8  $\mu$ L of 3'-Linker ligated RNA to a PCR tube (on ice)
2. Add 1  $\mu$ L of 2  $\mu$ M barcoded RT-primer

#### RT mix I

|               |           |
|---------------|-----------|
| 5x RT buffer  | 4 $\mu$ L |
| 8.2 mM dATP   | 1 $\mu$ L |
| 8.2 mM dGTP   | 1 $\mu$ L |
| 8.2 mM dCTP   | 1 $\mu$ L |
| 8.2 mM BrdUTP | 1 $\mu$ L |

3. Add 8  $\mu$ L of RT mix I
4. Denature at 75  $^{\circ}$ C for 3 min, ramp down to 50  $^{\circ}$ C and hold

#### RT mix II

|                 |           |
|-----------------|-----------|
| 0.1 M DTT       | 1 $\mu$ L |
| RNaseOUT        | 1 $\mu$ L |
| Superscript III | 1 $\mu$ L |

5. Add 3  $\mu$ L of RT mix II
6. Incubate on Thermal Cycler
 

|                          |        |
|--------------------------|--------|
| [Step 1] 50 $^{\circ}$ C | 45 min |
| [Step 2] 55 $^{\circ}$ C | 15 min |
| [Step 3] 85 $^{\circ}$ C | 5 min  |
| [Step 4] 37 $^{\circ}$ C | hold   |
7. Add 1  $\mu$ L of RNase H



8. Incubate at 37 °C for 20 min
9. Add 19 µL of DNase-free water
10. Pass through G-25 column by centrifugation at 3,000 rpm for 1 min

cDNA purification with anti-BrdU antibody-coupled beads:

1. Measure volume of cDNA, add DNase-free water up to 60 µL
2. Add 75 µL of 2x IP Buffer and 15 µL of 50x Denhardt's solution
3. Incubate at 70 °C for 3 min, and then put on ice for 3 min
4. Add to prepared the tube of Anti-BrdU antibody-coupled beads
5. Rotate the beads at room temp. for 1 hr
6. Wash the beads 1 time with 1 mL of 1x IP Buffer containing 5x Denhardt's solution
7. Wash the beads 2 times with 1 mL of Nelson Low-salt Buffer containing 1x Denhardt's solution
8. Wash the beads 2 times with 1 mL of Nelson Stringent Buffer containing 1x Denhardt's solution
9. Wash the beads 2 time with 1 mL of CircLigase Wash Buffer

**Circ Reaction Mix**

|                          |       |
|--------------------------|-------|
| 10x Circ reaction buffer | 2 µL  |
| 5 M Betaine              | 4 µL  |
| 50 mM MnCl <sub>2</sub>  | 1 µL  |
| DNase-free water         | 13 µL |

10. Add 20 µL of Circ Reaction Mix
11. Denature at 98 °C for 3 min
12. Stand on a magnetic stand, recover the supernatant\* *\*You can stop here and store the sample at -30 °C*

**IX. Circularization & Re-linearization**

Circularization:

**Circ Enzyme Mix**

|                  |        |
|------------------|--------|
| 0.1 M DTT        | 0.2 µL |
| CircLigase       | 0.5 µL |
| DNase-free water | 0.3 µL |

1. Add 1 µL of Circ Enzyme Mix to the sample
2. Incubate at 60 °C for 1 hour
3. Incubate at 80 °C for 10 min to inactivate the enzyme
4. Let sit on ice for cool down

Re-linearization:

**APE1 Reaction Mix**

|                          |       |
|--------------------------|-------|
| 10x APE1 reaction buffer | 10 µL |
| APE1                     | 1 µL  |
| DNase-free water         | 69 µL |

5. Add 80 µL of APE1 Reaction Mix
6. Incubate at 37 °C for 1 hour

**X. Phenol/Chloroform extraction & Ethanol precipitation**

Phenol/Chloroform extraction:

1. Add 200 µL of Phenol:Chloroform:Isoamyl Alcohol (25:24:1, pH 7.9), mix by vortex mixer

2. Centrifuge at 20,000xg, room temp., 5 min
3. Transfer aqueous phase to a new 1.5 mL micro tube.
4. Add 20  $\mu$ L of 3M NaOAc (pH5.5), 500  $\mu$ L of 100% ethanol, 1.5  $\mu$ L of GlycoBlue
5. Precipitate, -30  $^{\circ}$ C, overnight

#### Day 4

#### XI. Amplification PCR

1. Centrifuge the RNA at 20,000xg, 4  $^{\circ}$ C, 10 min
2. Wash twice with 1mL of cold 70% ethanol
3. Dry up the pellet, resuspend in 15  $\mu$ L of DNase-free water
4. Transfer 12.5  $\mu$ L\* of cDNA library to a PCR tube *\*For check success of cDNA lib. prep., the rest cDNA was analyzed by TaqMan PCR in advance*

##### Phusion PCR Reaction Mix

|                            |              |                                                        |
|----------------------------|--------------|--------------------------------------------------------|
| 2x Phusion Master Mix      | 12.5 $\mu$ L |                                                        |
| 20 $\mu$ M DSFP5-PE primer | 0.5 $\mu$ L  |                                                        |
| 20 $\mu$ M SP3 primer      | 0.5 $\mu$ L  |                                                        |
| 50x SYBR Green I*          | 0.5 $\mu$ L  | <i>*dilute 10,000x stock to 50x in dH<sub>2</sub>O</i> |

5. Add 12.5  $\mu$ L of Phusion PCR Reaction Mix
6. Execute PCR reaction in real-time PCR machine

|                                                                  |        |
|------------------------------------------------------------------|--------|
| [Step 1] 98 $^{\circ}$ C                                         | 30 sec |
| Step 2-4: Cycle reaction (cycle # depending on the cDNA library) |        |
| [Step 2] 98 $^{\circ}$ C                                         | 10 sec |
| [Step 3] 65 $^{\circ}$ C                                         | 15 sec |
| [Step 4] 72 $^{\circ}$ C                                         | 20 sec |
| [Step 5] 25 $^{\circ}$ C                                         | hold   |

#### XII. PAGE Purification

##### TBE-PAGE:

1. Add 5 $\mu$ L of 6x Loading Dye to a PCR product, mix
2. Load the sample on 7.5% TBE Gel
3. Run at 200 V for 40 min in TBE buffer
4. Stain the gel with SybrGold 10000-fold diluted with TBE buffer for 5 min
5. Visualize on a blue-light transilluminator, excise the library smear bands on the gel [typically 120-200 bp]

##### Gel Extraction using MinElute Gel Extraction Kit:

6. Weigh a 2 mL micro tube with the gel slice
7. Add 2 volumes of Diffusion Buffer
8. Crash the gel slice using a 1 mL syringe plunger
9. Incubate at 50  $^{\circ}$ C for 30 min
10. Pass the gel slurry through Nanosep MF column by centrifugation at 15,000 rpm for 5 min
11. Measure volume of flow-through
12. Add 3 volumes of Buffer QG
13. Transfer 700  $\mu$ L of the sample to an MinElute spin column placed in a 2 mL collection tube
14. Centrifuge at 20,000xg, room temp., 1 min, and then discard the flow-through
15. Transfer the remaining sample, repeat to centrifuge and discard
16. Add 500  $\mu$ L of Buffer QG
17. Centrifuge at 20,000xg, room temp., 1 min, and then discard the flow-through

18. Add 750  $\mu\text{L}$  of Buffer PE
19. Centrifuge at 20,000 $\times g$ , room temp., 1 min, and then discard the flow-through
20. Re-centrifuge at 20,000 $\times g$ , room temp., 1 min
21. Place the spin column in a new 1.5 mL collection tube
22. Add 20  $\mu\text{L}$  DNase-free water directly to the center of the spin column membrane
23. Let stand for 1min
24. Centrifuge at 20,000 $\times g$ , room temp., 1 min
25. Recover the flow-through (CLIP library)

## Day 5

### XIII. Quality & Quantity check

Measure peak size of CLIP library by TapeStation

Quantitate concentration of CLIP library by KAPA Library Quantification Kit

### XIV. Sequencing

Dilute CLIP libraries to 2 nM each, mix in case of multiplex run

Sequence on MiSeq at 10-15 pM final concentration using Read 1 sequencing primer supplied in cartridge

## Day X

### S-I. 5'-adenylated 3'-linker preparation

#### 5' Adenylation:

##### Reaction mix

|                                        |                    |
|----------------------------------------|--------------------|
| 20 $\mu\text{M}$ RL3                   | 30 $\mu\text{L}$   |
| 10x 5' DNA Adenylation Reaction Buffer | 12 $\mu\text{L}$   |
| 10 mM ATP                              | 1.2 $\mu\text{L}$  |
| Mth RNA ligase                         | 6 $\mu\text{L}$    |
| RNase-free water                       | 70.8 $\mu\text{L}$ |

1. Prepare reaction mix in a 1.5 mL micro tube
2. Incubate at 65  $^{\circ}\text{C}$  for 1 hour
3. Incubate at 85  $^{\circ}\text{C}$  for 5 min to inactivate the enzyme
4. Let sit on ice

#### RNA purification:

5. Add 80  $\mu\text{L}$  of RNase-free water
6. Add 200  $\mu\text{L}$  of Acidic Phenol/Chloroform, mix by vortex mixer
7. Centrifuge at 20,000 $\times g$ , room temp., 5 min
8. Transfer aqueous phase to a new 1.5 mL micro tube.
9. Add 20  $\mu\text{L}$  of 3M NaOAc (pH5.5), 500  $\mu\text{L}$  of 100% ethanol, 1.5  $\mu\text{L}$  of GlycoBlue
10. Precipitate at -80  $^{\circ}\text{C}$  for 2 hours or overnight
11. Centrifuge the RNA at 20,000 $\times g$  at 4  $^{\circ}\text{C}$  for 15 min
12. Wash 2 times with 1mL of cold 75% ethanol
13. Dry up the pellet, resuspend in 30  $\mu\text{L}$  of RNase-free water
